# Supplementary material
Source: publisher site journal article supplement (https://www.dovepress.com/article/401505)
Supplement: Supplementary file 1 [file get_supplementary_file.php]

## Supplementary files

**Supplementary Table 1.** Comparison of patients with other comorbidities between the SITT and SIDT pre-treatment

| Comorbidities                   | SITT, n = 52 | SIDT, n = 49 | P-value |
|---------------------------------|--------------|--------------|---------|
| Allergic rhinitis               | 22 (42.3)    | 16 (32.7)    | 0.4     |
| Atopic dermatitis               | 2 (3.9)      | 1 (2.0)      | 1.0     |
| Sinusitis with nasal polyps     | 0 (0)        | 1 (2.0)      | 0.5     |
| ANCA-related disease            | 0 (0)        | 0 (0)        | 1.0     |
| Hypertension                    | 8 (15.4)     | 13 (26.5)    | 0.2     |
| Hyperlipidemia                  | 6 (11.5)     | 9 (18.4)     | 0.4     |
| Mood disorder                   | 4 (7.7)      | 3 (6.1)      | 1.0     |
| Gastroesophageal reflux disease | 5 (9.6)      | 1 (2.0)      | 0.2     |
| Diabetes                        | 3 (5.8)      | 1 (2.0)      | 0.6     |
| Central nervous system disorder | 3 (5.8)      | 1 (2.0)      | 0.6     |
| Cardiac disease                 | 2 (3.9)      | 1 (2.0)      | 1.0     |
| Collagen vascular diseases      | 1 (1.9)      | 2 (4.1)      | 0.6     |
| Arrhythmia                      | 0 (0)        | 1 (2.0)      | 0.5     |
| Chronic hepatitis               | 1 (1.9)      | 1 (2.0)      | 1.0     |
| Hypothyroidism                  | 2 (3.9)      | 0 (0)        | 0.5     |
| Benign prostatic hyperplasia    | 0 (0)        | 1 (2.0)      | 0.5     |

**Notes:** No patient had malignancies or chronic kidney diseases.

**Abbreviations:** ANCA; anti-neutrophil cytoplasmic antibody, SIDT; single-inhaler dual therapy, SITT; single-inhaler triple therapy

**Supplementary Table 2.** Regimens of controllers in SITT and SIDT in this study

| <b>SITT, n = 52</b>                                         |                      |                    |                       |                            |
|-------------------------------------------------------------|----------------------|--------------------|-----------------------|----------------------------|
| <b>Controller via device</b>                                | <b>ICS/LABA/LAMA</b> | <b>Daily doses</b> | <b>Administration</b> | <b>No. (%) of patients</b> |
| <b>Enerzair® via Breezhaler®</b>                            |                      |                    |                       | 16 (30.8)                  |
| high-dose                                                   | MF/IND/GLY           | 160/150/50 µg      | once daily            | 5 (9.6)                    |
| medium-dose                                                 | MF/IND/GLY           | 80/150/50 µg       | once daily            | 11 (21.2)                  |
| <b>Trelegy® via Ellipta®</b>                                |                      |                    |                       | 36 (69.2)                  |
| high-dose                                                   | FF/VI/UMEC           | 200/25/62.5 µg     | once daily            | 10 (19.2)                  |
| medium-dose                                                 | FF/VI/UMEC           | 100/25/62.5 µg     | once daily            | 26 (50.0)                  |
| <b>SIDT, n = 49</b>                                         |                      |                    |                       |                            |
| <b>Controller via device</b>                                | <b>ICS/LABA</b>      | <b>Daily doses</b> | <b>Administration</b> | <b>No. (%) of patients</b> |
| <b>Atecura® via Breezhaler®</b>                             |                      |                    |                       | 4 (8.2)                    |
| high-dose                                                   | MF/IND               | 160/150 µg         | once daily            | 0 (0)                      |
| medium-dose                                                 | MF/IND               | 80/150 µg          | once daily            | 4 (8.2)                    |
| <b>Relovair® via Ellipta®</b>                               |                      |                    |                       | 20 (40.8)                  |
| high-dose                                                   | FF/VI                | 200/25 µg          | once daily            | 19 (38.8)                  |
| medium-dose                                                 | FF/VI                | 100/25 µg          | once daily            | 1 (2.0)                    |
| <b>Flutiform125® via a pressurized metered dose inhaler</b> |                      |                    |                       | 12 (24.5)                  |
| high-dose                                                   | FP/FF                | >625/25 µg         | twice daily           | 0 (0)                      |
| medium-dose                                                 | FP/FF                | 500/20 µg          | twice daily           | 12 (24.5)                  |
| <b>Symbicort® via Turbuhaler®</b>                           |                      |                    |                       | 13 (26.5)                  |
| high-dose                                                   | BUD/FF               | 1280/36 µg         | twice daily           | 1 (2.0)                    |
| medium-dose                                                 | BUD/FF               | 640/18 µg          | twice daily           | 12 (24.5)                  |

**Notes:** The percentage (%) of patients was estimated using the subtotal study population (SITT for n = 52 and SIDT for n = 49, respectively).

**Abbreviations:** BUD; budesonide, FF; fluticasone furoate, FF; formoterol fumarate, FP; fluticasone propionate, GLY; glycopyrronium bromide, IND; indacaterol acetate, MF; mometasone furoate, SIDT; single-inhaler dual therapy, SITT; single-inhaler triple therapy, UMEC; umeclidinium bromide, VI; vilanterol trifenate.

**Supplementary Table 3.** Relative glucocorticoid receptor-binding affinity among ICS in our study

| Corticosteroids        | Relative glucocorticoid receptor-binding affinity compared to dexamethasone |
|------------------------|-----------------------------------------------------------------------------|
| Fluticasone furoate    | 29.9                                                                        |
| Mometasone furoate     | 21.0                                                                        |
| Fluticasone propionate | 17.8                                                                        |
| Budesonide             | 9.4                                                                         |
| Dexamethasone          | 1                                                                           |

**Notes:** Glucocorticoid receptor-binding affinity is relative to dexamethasone, where dexamethasone affinity = 1 in accordance with a previous review reference below.

**Abbreviations:** ICS; inhaled corticosteroid

#### Reference

Daley-Yates PT. Inhaled corticosteroids: potency, dose equivalence, and therapeutic index. *Br J Clin Pharmacol* 2015; **80**: 372-80.

## Supplementary Figure 1.

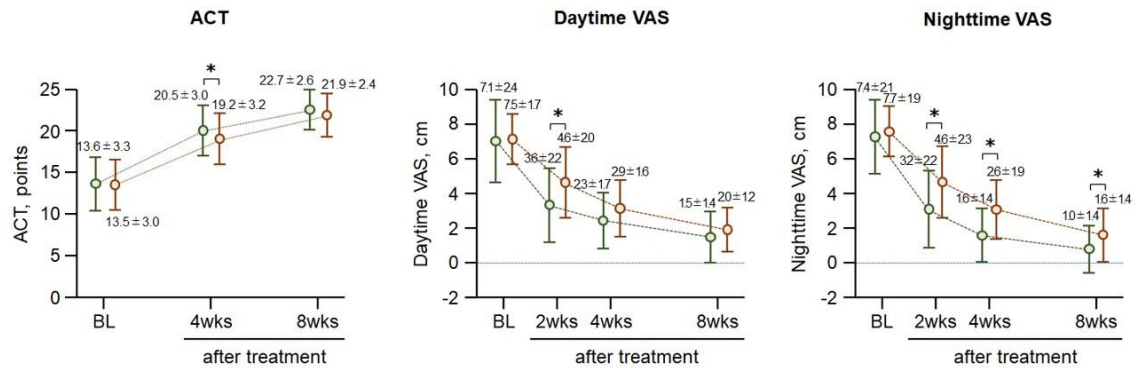

**Notes:** All data are expressed as mean  $\pm$  standard deviation. The mean ACT scores with SITT were significantly higher than those with SIDT four weeks post-treatment ( $P = 0.0443$ ). The mean daytime VAS scores with SITT were significantly lower than those with SIDT two weeks post-treatment ( $P = 0.0280$ ). In contrast, the nighttime VAS scores with SITT were significantly lower than those with SIDT two ( $P = 0.0026$ ), four ( $P = 0.0100$ ), and eight weeks ( $P = 0.0288$ ) post-treatment.

\*  $P < 0.05$  when comparing between SITT and SIDT at each visit

**Abbreviations:** ACT; asthma control test, SIDT; single-inhaler dual therapy, SITT; single-inhaler triple therapy, VAS; visual analog scale, wks; weeks
